# Supplementary material
Source: Springer Nature journal article supplement (https://www.springermedizin.de/resource/supplementary/12885_2010_2757_MOESM5_ESM.pdf/9461814)

**A. Patients clustered by 26 biomarkers**

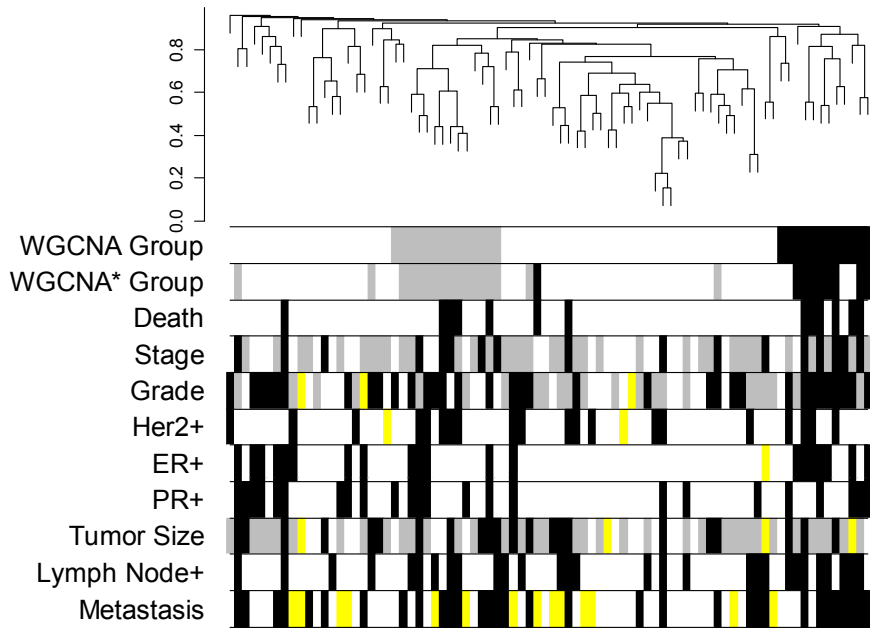

**B. Mortality rates (and SD errors) by WGCNA,  $p = 2.5 \times 10^{-4}$**

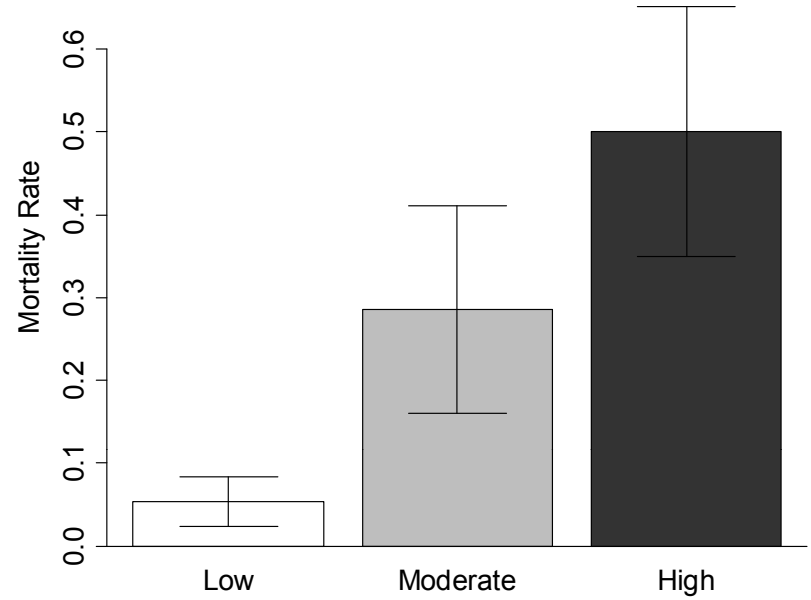

**C. Survival by WGCNA patient groups,  $p = 3.9 \times 10^{-4}$**

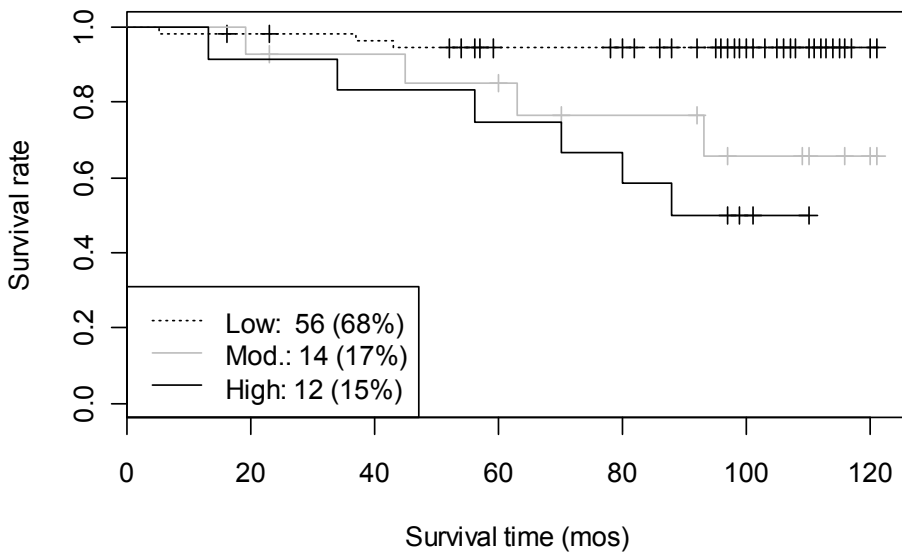

**D. Survival by WGCNA\* patient groups,  $p = 9.1 \times 10^{-6}$**

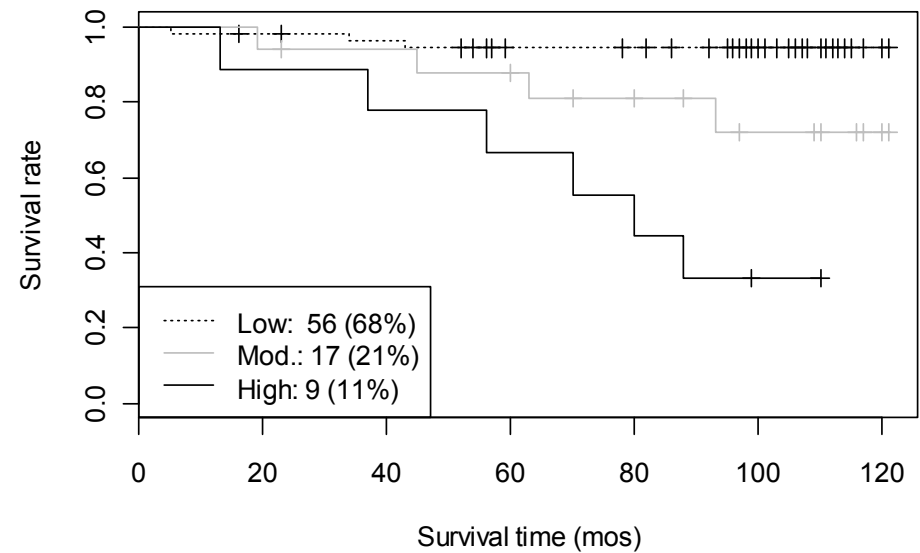

Supplement: MOESM5 [file 9461814]
